# Supplementary material for: Time trends in occupational exposure to chemicals in Sweden: proportion exposed, distribution across demographic and labor market strata, and exposure levels
Source: PubMed Central journal article supplement (PMC9888437; doi:10.5271/sjweh.4040), 2022-08-31
Supplement: SJWEH-48-479-S001.pdf [file SJWEH-48-479-S001.pdf]

# Time trends in occupational exposure to chemicals in Sweden: proportion exposed, distribution across demographic and labor market strata, and exposure levels<sup>1</sup>

by Per Gustavsson, MD,<sup>2</sup> Pernilla Wiebert, PhD, Håkan Tinnerberg, PhD, Theo Bodin, MD, Anette Linnarsjö, Lic Med Sci, Ida Hed Myrberg, MSc, Maria Albin, MD, Jenny Selander, PhD

1. Supplementary material
2. Correspondence to: Per Gustavsson, Unit of Occupational Medicine, Karolinska Institutet, Solnavägen 4, 113 65 Stockholm, Sweden. [E-mail: per.gustavsson@ki.se]

**Table S1. Distribution of persons exposed to respirable crystalline silica (RCS) across demographic and labour market strata and over time.**

| Stratum                            | 1980    |      | 1985    |      | 1990    |      | 2001    |      | 2005    |      | 2009    |      | 2013    |      |
|------------------------------------|---------|------|---------|------|---------|------|---------|------|---------|------|---------|------|---------|------|
|                                    | n       | %    | n       | %    | n       | %    | n       | %    | n       | %    | n       | %    | n       | %    |
| <b>Exposed in study population</b> | 146 150 | 100  | 130 755 | 100  | 142 082 | 100  | 102 960 | 100  | 106 456 | 100  | 113 250 | 100  | 116 020 | 100  |
| <b>Age</b>                         |         |      |         |      |         |      |         |      |         |      |         |      |         |      |
| 18-24                              | 24 803  | 17   | 24 124  | 18.4 | 27 110  | 19.1 | 10 233  | 9.9  | 10 078  | 9.5  | 13 754  | 12.1 | 14 034  | 12.1 |
| 25-34                              | 37 887  | 25.9 | 29 984  | 22.9 | 37 692  | 26.5 | 25 288  | 24.6 | 23 516  | 22.1 | 23 410  | 20.7 | 26 780  | 23.1 |
| 35-44                              | 32 436  | 22.2 | 33 860  | 25.9 | 33 045  | 23.3 | 27 005  | 26.2 | 28 863  | 27.1 | 28 690  | 25.3 | 25 655  | 22.1 |
| 45-54                              | 26 359  | 18   | 24 801  | 19   | 28 270  | 19.9 | 23 255  | 22.6 | 23 227  | 21.8 | 25 793  | 22.8 | 28 558  | 24.6 |
| >=55                               | 24 673  | 16.9 | 17 991  | 13.8 | 15 966  | 11.2 | 17 182  | 16.7 | 20 775  | 19.5 | 21 605  | 19.1 | 20 994  | 18.1 |
| <b>Sex</b>                         |         |      |         |      |         |      |         |      |         |      |         |      |         |      |
| Females                            | 6 060   | 4.1  | 5 125   | 3.9  | 5 375   | 3.8  | 6 993   | 6.8  | 6 069   | 5.7  | 6 434   | 5.7  | 6 899   | 5.9  |
| Males                              | 140 094 | 95.9 | 125 630 | 96.1 | 136 709 | 96.2 | 95 965  | 93.2 | 100 387 | 94.3 | 106 817 | 94.3 | 109 120 | 94.1 |
| <b>Country of birth</b>            |         |      |         |      |         |      |         |      |         |      |         |      |         |      |
| Sweden                             | 132 583 | 90.7 | 119 749 | 91.6 | 130 292 | 91.7 | 92 809  | 90.1 | 96 339  | 90.5 | 100 624 | 88.9 | 101 372 | 87.4 |
| Other Nordic country               | 10 435  | 7.1  | 8 285   | 6.3  | 8 190   | 5.8  | 4 640   | 4.5  | 4 192   | 3.9  | 3 593   | 3.2  | 2 893   | 2.5  |
| Other European country             | 2 689   | 1.8  | 2 296   | 1.8  | 2 430   | 1.7  | 3 593   | 3.5  | 3 831   | 3.6  | 5 857   | 5.2  | 7 592   | 6.5  |
| Outside Europe                     | 428     | 0.3  | 426     | 0.3  | 1 174   | 0.8  | 1 916   | 1.9  | 2 093   | 2    | 3 173   | 2.8  | 4 152   | 3.6  |
| <b>Company size</b>                |         |      |         |      |         |      |         |      |         |      |         |      |         |      |
| 1-49 employees                     |         |      |         |      | 48 040  | 33.8 | 39 814  | 38.7 | 44 483  | 41.8 | 52 635  | 46.5 | 57 553  | 49.7 |
| 50+ employees                      |         |      |         |      | 94 043  | 66.2 | 63 035  | 61.3 | 61 822  | 58.2 | 60 497  | 53.5 | 58 188  | 50.3 |
| <b>Sector</b>                      |         |      |         |      |         |      |         |      |         |      |         |      |         |      |
| Private                            | 128 550 | 88.2 | 113 476 | 87.6 | 129 930 | 91.5 | 96 626  | 93.9 | 100 523 | 94.6 | 107 318 | 94.9 | 109 864 | 94.9 |
| Public                             | 17 201  | 11.8 | 16 021  | 12.4 | 12 078  | 8.5  | 6 225   | 6.1  | 5 783   | 5.4  | 5 812   | 5.1  | 5 874   | 5.1  |

**Industry branch**

|                            |        |      |        |      |        |      |        |      |        |      |
|----------------------------|--------|------|--------|------|--------|------|--------|------|--------|------|
| Not specified              | 2 008  | 1.4  | 602    | 0.6  | 740    | 0.7  | 1 275  | 1.1  | 2 176  | 1.9  |
| Agriculture etc.           | 1 255  | 0.9  | 670    | 0.7  | 915    | 0.9  | 925    | 0.8  | 598    | 0.5  |
| Manufacturing etc.         | 31 712 | 22.3 | 46 980 | 45.6 | 45 308 | 42.6 | 41 278 | 36.4 | 36 407 | 31.4 |
| Energy supply              | 4 449  | 3.1  | 551    | 0.5  | 619    | 0.6  | 832    | 0.7  | 818    | 0.7  |
| Construction               | 89 115 | 62.7 | 41 898 | 40.7 | 45 002 | 42.3 | 52 780 | 46.6 | 57 443 | 49.5 |
| Trade etc.                 | 4 303  | 3    | 3 978  | 3.9  | 4 393  | 4.1  | 4 576  | 4    | 5 193  | 4.5  |
| Financial activities etc.  | 5 348  | 3.8  | 5 069  | 4.9  | 5 642  | 5.3  | 6 912  | 6.1  | 8 552  | 7.4  |
| Education etc.             | 415    | 0.3  | 454    | 0.4  | 575    | 0.5  | 686    | 0.6  | 830    | 0.7  |
| Health etc.                | 1 392  | 1    | 502    | 0.5  | 560    | 0.5  | 746    | 0.7  | 885    | 0.8  |
| Personal services etc.     | 1 250  | 0.9  | 1 463  | 1.4  | 1 909  | 1.8  | 2 159  | 1.9  | 2 077  | 1.8  |
| Public administration etc. | 850    | 0.6  | 797    | 0.8  | 799    | 0.8  | 1 083  | 1    | 1 048  | 0.9  |

---

**Table S2. Distribution of persons exposed to diesel exhaust across demographic and labour market strata and over time**

| Stratum                            | 1980    |      | 1985    |      | 1990    |      | 2001    |      | 2005    |      | 2009    |      | 2013    |      |
|------------------------------------|---------|------|---------|------|---------|------|---------|------|---------|------|---------|------|---------|------|
|                                    | n       | %    | n       | %    | n       | %    | n       | %    | n       | %    | n       | %    | n       | %    |
| <b>Exposed in study population</b> | 147 169 | 100  | 137 599 | 100  | 146 255 | 100  | 105 108 | 100  | 114 861 | 100  | 119 446 | 100  | 118 309 | 100  |
| <b>Age</b>                         |         |      |         |      |         |      |         |      |         |      |         |      |         |      |
| 18-24                              | 20 890  | 14.2 | 17 665  | 12.8 | 19 485  | 13.3 | 9 222   | 8.8  | 8 978   | 7.8  | 10 142  | 8.5  | 10 517  | 8.9  |
| 25-34                              | 42 703  | 29   | 35 941  | 26.1 | 38 054  | 26   | 22 654  | 21.6 | 23 397  | 20.4 | 24 293  | 20.3 | 25 439  | 21.5 |
| 35-44                              | 37 787  | 25.7 | 40 200  | 29.2 | 37 737  | 25.8 | 27 693  | 26.3 | 29 284  | 25.5 | 27 724  | 23.2 | 24 592  | 20.8 |
| 45-54                              | 26 643  | 18.1 | 26 794  | 19.5 | 33 630  | 23   | 26 112  | 24.8 | 28 107  | 24.5 | 30 420  | 25.5 | 30 743  | 26   |
| >=55                               | 19 157  | 13   | 17 003  | 12.4 | 17 356  | 11.9 | 19 431  | 18.5 | 25 101  | 21.9 | 26 863  | 22.5 | 27 017  | 22.8 |
| <b>Sex</b>                         |         |      |         |      |         |      |         |      |         |      |         |      |         |      |
| Females                            | 10 853  | 7.4  | 11 306  | 8.2  | 12 829  | 8.8  | 10 064  | 9.6  | 10 818  | 9.4  | 12 370  | 10.4 | 12 950  | 10.9 |
| Males                              | 136 323 | 92.6 | 126 295 | 91.8 | 133 427 | 91.2 | 95 046  | 90.4 | 104 043 | 90.6 | 107 077 | 89.6 | 105 355 | 89.1 |
| <b>Country of birth</b>            |         |      |         |      |         |      |         |      |         |      |         |      |         |      |
| Sweden                             | 134 569 | 91.4 | 126 159 | 91.7 | 133 332 | 91.2 | 94 837  | 90.2 | 102 258 | 89   | 103 239 | 86.4 | 98 911  | 83.6 |
| Other Nordic country               | 7 854   | 5.3  | 6 815   | 5    | 6 949   | 4.8  | 3 320   | 3.2  | 3 275   | 2.9  | 2 985   | 2.5  | 2 494   | 2.1  |
| Other European country             | 3 835   | 2.6  | 3 623   | 2.6  | 3 971   | 2.7  | 3 831   | 3.6  | 4 741   | 4.1  | 6 115   | 5.1  | 7 307   | 6.2  |
| Outside Europe                     | 910     | 0.6  | 1 002   | 0.7  | 2 003   | 1.4  | 3 123   | 3    | 4 584   | 4    | 7 104   | 5.9  | 9 590   | 8.1  |
| <b>Company size</b>                |         |      |         |      |         |      |         |      |         |      |         |      |         |      |
| 1-49 employees                     |         |      |         |      | 56 839  | 38.9 | 48 896  | 46.6 | 54 402  | 47.5 | 57 427  | 48.1 | 55 183  | 46.7 |
| 50+ employees                      |         |      |         |      | 89 419  | 61.1 | 56 069  | 53.4 | 60 233  | 52.5 | 61 879  | 51.9 | 62 875  | 53.3 |
| <b>Sector</b>                      |         |      |         |      |         |      |         |      |         |      |         |      |         |      |
| Private                            | 125 897 | 85.7 | 114 858 | 84.2 | 126 964 | 86.9 | 96 314  | 91.8 | 105 780 | 92.3 | 110 508 | 92.6 | 109 902 | 93.1 |
| Public                             | 21 002  | 14.3 | 21 548  | 15.8 | 19 181  | 13.1 | 8 650   | 8.2  | 8 853   | 7.7  | 8 799   | 7.4  | 8 154   | 6.9  |
| <b>Industry branch</b>             |         |      |         |      |         |      |         |      |         |      |         |      |         |      |
| Not specified                      |         |      |         |      | 1 867   | 1.3  | 634     | 0.6  | 735     | 0.6  | 615     | 0.5  | 666     | 0.6  |
| Agriculture etc.                   |         |      |         |      | 1 464   | 1    | 3 531   | 3.4  | 4 077   | 3.5  | 3 877   | 3.2  | 3 662   | 3.1  |
| Manufacturing etc.                 |         |      |         |      | 35 722  | 24.4 | 13 219  | 12.6 | 15 085  | 13.1 | 13 718  | 11.5 | 11 363  | 9.6  |
| Energy supply                      |         |      |         |      | 2 746   | 1.9  | 1 368   | 1.3  | 1 821   | 1.6  | 1 900   | 1.6  | 1 763   | 1.5  |
| Construction                       |         |      |         |      | 19 901  | 13.6 | 6 799   | 6.5  | 8 577   | 7.5  | 10 057  | 8.4  | 10 409  | 8.8  |
| Trade etc.                         |         |      |         |      | 71 206  | 48.7 | 65 113  | 61.9 | 68 186  | 59.4 | 71 312  | 59.7 | 72 620  | 61.4 |
| Financial activities etc.          |         |      |         |      | 4 478   | 3.1  | 5 354   | 5.1  | 6 698   | 5.8  | 7 822   | 6.5  | 7 976   | 6.7  |
| Education etc.                     |         |      |         |      | 566     | 0.4  | 733     | 0.7  | 792     | 0.7  | 874     | 0.7  | 644     | 0.5  |
| Health etc.                        |         |      |         |      | 1 654   | 1.1  | 848     | 0.8  | 920     | 0.8  | 1 192   | 1    | 1 237   | 1    |
| Personal services etc.             |         |      |         |      | 1 339   | 0.9  | 1 606   | 1.5  | 1 909   | 1.7  | 2 082   | 1.7  | 2 072   | 1.8  |
| Public administration etc.         |         |      |         |      | 5 317   | 3.6  | 5 904   | 5.6  | 6 066   | 5.3  | 5 996   | 5    | 5 893   | 5    |

**Table S3. Distribution of persons exposed to welding fumes across demographic and labour market strata and over time.**

| Stratum                            | 1980    |      | 1985    |      | 1990   |      | 2001   |      | 2005   |      | 2009   |      | 2013   |      |
|------------------------------------|---------|------|---------|------|--------|------|--------|------|--------|------|--------|------|--------|------|
|                                    | n       | %    | n       | %    | n      | %    | n      | %    | n      | %    | n      | %    | n      | %    |
| <b>Exposed in study population</b> | 111 306 | 100  | 102 336 | 100  | 99 962 | 100  | 71 644 | 100  | 70 356 | 100  | 71 219 | 100  | 70 306 | 100  |
| <b>Age</b>                         |         |      |         |      |        |      |        |      |        |      |        |      |        |      |
| 18-24                              | 22 801  | 20.5 | 21 525  | 21   | 20 924 | 20.9 | 6 970  | 9.7  | 5 860  | 8.3  | 7 573  | 10.6 | 7 384  | 10.5 |
| 25-34                              | 32 432  | 29.1 | 27 098  | 26.5 | 26 764 | 26.8 | 17 629 | 24.6 | 14 902 | 21.2 | 14 237 | 20   | 15 061 | 21.4 |
| 35-44                              | 25 968  | 23.3 | 26 055  | 25.5 | 23 285 | 23.3 | 18 801 | 26.2 | 19 048 | 27.1 | 17 872 | 25.1 | 15 386 | 21.9 |
| 45-54                              | 17 064  | 15.3 | 17 126  | 16.7 | 19 320 | 19.3 | 16 358 | 22.8 | 16 303 | 23.2 | 17 059 | 24   | 17 913 | 25.5 |
| >=55                               | 13 047  | 11.7 | 10 536  | 10.3 | 9 667  | 9.7  | 11 884 | 16.6 | 14 241 | 20.2 | 14 476 | 20.3 | 14 563 | 20.7 |
| <b>Sex</b>                         |         |      |         |      |        |      |        |      |        |      |        |      |        |      |
| Females                            | 6 992   | 6.3  | 6 788   | 6.6  | 7 797  | 7.8  | 3 124  | 4.4  | 3 147  | 4.5  | 3 201  | 4.5  | 3 417  | 4.9  |
| Males                              | 104 312 | 93.7 | 95 549  | 93.4 | 92 166 | 92.2 | 68 518 | 95.6 | 67 209 | 95.5 | 68 016 | 95.5 | 66 891 | 95.1 |
| <b>Country of birth</b>            |         |      |         |      |        |      |        |      |        |      |        |      |        |      |
| Sweden                             | 93 930  | 84.4 | 88 534  | 86.5 | 86 110 | 86.1 | 64 242 | 89.7 | 63 191 | 89.8 | 63 444 | 89.1 | 62 224 | 88.5 |
| Other Nordic country               | 11 671  | 10.5 | 8 969   | 8.8  | 8 004  | 8    | 3 416  | 4.8  | 2 983  | 4.2  | 2 442  | 3.4  | 1 915  | 2.7  |
| Other European country             | 4 921   | 4.4  | 3 988   | 3.9  | 3 680  | 3.7  | 2 558  | 3.6  | 2 567  | 3.6  | 3 134  | 4.4  | 3 513  | 5    |
| Outside Europe                     | 773     | 0.7  | 850     | 0.8  | 2 167  | 2.2  | 1 428  | 2    | 1 612  | 2.3  | 2 195  | 3.1  | 2 651  | 3.8  |
| <b>Company size</b>                |         |      |         |      |        |      |        |      |        |      |        |      |        |      |
| 1-49 employees                     |         |      |         |      | 35 007 | 35   | 32 234 | 45   | 33 013 | 47   | 35 138 | 49.4 | 35 259 | 50.3 |
| 50+ employees                      |         |      |         |      | 64 953 | 65   | 39 343 | 55   | 37 252 | 53   | 36 012 | 50.6 | 34 894 | 49.7 |
| <b>Sector</b>                      |         |      |         |      |        |      |        |      |        |      |        |      |        |      |
| Private                            | 104 885 | 94.4 | 94 800  | 93.8 | 94 606 | 94.7 | 66 342 | 92.7 | 65 331 | 93   | 66 689 | 93.7 | 65 926 | 94   |
| Public                             | 6 255   | 5.6  | 6 230   | 6.2  | 5 318  | 5.3  | 5 236  | 7.3  | 4 934  | 7    | 4 460  | 6.3  | 4 227  | 6    |
| <b>Industry branch</b>             |         |      |         |      |        |      |        |      |        |      |        |      |        |      |
| Not specified                      |         |      |         |      | 1 231  | 1.2  | 447    | 0.6  | 465    | 0.7  | 472    | 0.7  | 659    | 0.9  |
| Agriculture etc.                   |         |      |         |      | 546    | 0.5  | 307    | 0.4  | 414    | 0.6  | 362    | 0.5  | 291    | 0.4  |
| Manufacturing etc.                 |         |      |         |      | 59 475 | 59.5 | 30 813 | 43   | 26 815 | 38.1 | 25 376 | 35.6 | 22 585 | 32.1 |
| Energy supply                      |         |      |         |      | 654    | 0.7  | 436    | 0.6  | 535    | 0.8  | 471    | 0.7  | 581    | 0.8  |
| Construction                       |         |      |         |      | 17 224 | 17.2 | 17 297 | 24.1 | 17 775 | 25.3 | 19 523 | 27.4 | 20 183 | 28.7 |
| Trade etc.                         |         |      |         |      | 15 409 | 15.4 | 10 427 | 14.6 | 10 859 | 15.4 | 11 313 | 15.9 | 11 950 | 17   |
| Financial activities etc.          |         |      |         |      | 3 041  | 3    | 6 148  | 8.6  | 7 296  | 10.4 | 7 635  | 10.7 | 8 162  | 11.6 |
| Education etc.                     |         |      |         |      | 225    | 0.2  | 1 539  | 2.1  | 1 501  | 2.1  | 1 347  | 1.9  | 1 240  | 1.8  |
| Health etc.                        |         |      |         |      | 692    | 0.7  | 621    | 0.9  | 562    | 0.8  | 1 055  | 1.5  | 1 099  | 1.6  |
| Personal services etc.             |         |      |         |      | 472    | 0.5  | 2 468  | 3.4  | 3 070  | 4.4  | 2 775  | 3.9  | 2 690  | 3.8  |
| Public administration etc.         |         |      |         |      | 997    | 1    | 1 138  | 1.6  | 1 056  | 1.5  | 885    | 1.2  | 871    | 1.2  |

**Table S4. Distribution of persons exposed to wood dust across demographic and labour market strata and over time.**

| Stratum                            | 1980    |      | 1985   |      | 1990   |      | 2001    |      | 2005   |      | 2009   |      | 2013    |      |
|------------------------------------|---------|------|--------|------|--------|------|---------|------|--------|------|--------|------|---------|------|
|                                    | n       | %    | n      | %    | n      | %    | n       | %    | n      | %    | n      | %    | n       | %    |
| <b>Exposed in study population</b> | 107 211 | 100  | 93 134 | 100  | 98 282 | 100  | 102 710 | 100  | 95 126 | 100  | 98 527 | 100  | 100 661 | 100  |
| <b>Age</b>                         |         |      |        |      |        |      |         |      |        |      |        |      |         |      |
| 18-24                              | 20 376  | 19   | 18 016 | 19.3 | 19 292 | 19.6 | 10 337  | 10.1 | 8 737  | 9.2  | 11 383 | 11.6 | 11 768  | 11.7 |
| 25-34                              | 28 622  | 26.7 | 22 327 | 24   | 25 286 | 25.7 | 24 812  | 24.2 | 21 211 | 22.3 | 20 334 | 20.6 | 22 767  | 22.6 |
| 35-44                              | 21 423  | 20   | 23 295 | 25   | 23 733 | 24.1 | 26 257  | 25.6 | 24 584 | 25.8 | 24 464 | 24.8 | 22 351  | 22.2 |
| 45-54                              | 17 824  | 16.6 | 15 857 | 17   | 18 283 | 18.6 | 23 491  | 22.9 | 20 911 | 22   | 22 499 | 22.8 | 24 640  | 24.5 |
| >=55                               | 18 967  | 17.7 | 13 640 | 14.6 | 11 688 | 11.9 | 17 811  | 17.3 | 19 685 | 20.7 | 19 841 | 20.1 | 19 133  | 19   |
| <b>Sex</b>                         |         |      |        |      |        |      |         |      |        |      |        |      |         |      |
| Females                            | 9 503   | 8.9  | 8 835  | 9.5  | 9 572  | 9.7  | 12 750  | 12.4 | 10 701 | 11.2 | 10 606 | 10.8 | 10 448  | 10.4 |
| Males                              | 97 710  | 91.1 | 84 299 | 90.5 | 88 711 | 90.3 | 89 957  | 87.6 | 84 423 | 88.8 | 87 923 | 89.2 | 90 214  | 89.6 |
| <b>Country of birth</b>            |         |      |        |      |        |      |         |      |        |      |        |      |         |      |
| Sweden                             | 99 915  | 93.2 | 87 320 | 93.8 | 91 470 | 93.1 | 94 589  | 92.1 | 87 564 | 92.1 | 88 942 | 90.3 | 88 914  | 88.3 |
| Other Nordic country               | 5 238   | 4.9  | 3 968  | 4.3  | 4 178  | 4.3  | 3 287   | 3.2  | 2 678  | 2.8  | 2 412  | 2.4  | 2 104   | 2.1  |
| Other European country             | 1 723   | 1.6  | 1 469  | 1.6  | 1 623  | 1.7  | 3 205   | 3.1  | 3 125  | 3.3  | 4 656  | 4.7  | 6 200   | 6.2  |
| Outside Europe                     | 333     | 0.3  | 378    | 0.4  | 1 008  | 1    | 1 624   | 1.6  | 1 755  | 1.8  | 2 517  | 2.6  | 3 439   | 3.4  |
| <b>Company size</b>                |         |      |        |      |        |      |         |      |        |      |        |      |         |      |
| 1-49 employees                     |         |      |        |      | 37 934 | 38.6 | 35 664  | 34.8 | 37 552 | 39.5 | 43 213 | 43.9 | 47 439  | 47.2 |
| 50+ employees                      |         |      |        |      | 60 347 | 61.4 | 66 939  | 65.2 | 57 451 | 60.5 | 55 222 | 56.1 | 53 057  | 52.8 |
| <b>Sector</b>                      |         |      |        |      |        |      |         |      |        |      |        |      |         |      |
| Private                            | 98 871  | 92.4 | 82 702 | 90.1 | 90 813 | 92.5 | 90 226  | 87.9 | 83 274 | 87.7 | 87 283 | 88.7 | 89 986  | 89.5 |
| Public                             | 8 148   | 7.6  | 9 095  | 9.9  | 7 413  | 7.5  | 12 379  | 12.1 | 11 728 | 12.3 | 11 153 | 11.3 | 10 509  | 10.5 |
| <b>Industry branch</b>             |         |      |        |      |        |      |         |      |        |      |        |      |         |      |
| Not specified                      |         |      |        |      | 1 775  | 1.8  | 733     | 0.7  | 791    | 0.8  | 1 120  | 1.1  | 1 922   | 1.9  |
| Agriculture etc.                   |         |      |        |      | 1 040  | 1.1  | 663     | 0.6  | 892    | 0.9  | 827    | 0.8  | 534     | 0.5  |
| Manufacturing etc.                 |         |      |        |      | 40 894 | 41.6 | 44 722  | 43.5 | 33 920 | 35.7 | 29 681 | 30.1 | 26 229  | 26.1 |
| Energy supply                      |         |      |        |      | 173    | 0.2  | 504     | 0.5  | 556    | 0.6  | 634    | 0.6  | 618     | 0.6  |
| Construction                       |         |      |        |      | 41 220 | 41.9 | 37 493  | 36.5 | 38 517 | 40.5 | 44 259 | 44.9 | 47 990  | 47.7 |
| Trade etc.                         |         |      |        |      | 3 790  | 3.9  | 3 610   | 3.5  | 4 184  | 4.4  | 3 905  | 4    | 4 356   | 4.3  |
| Financial activities etc.          |         |      |        |      | 3 316  | 3.4  | 4 572   | 4.5  | 5 105  | 5.4  | 6 180  | 6.3  | 7 412   | 7.4  |
| Education etc.                     |         |      |        |      | 3 089  | 3.1  | 7 366   | 7.2  | 7 676  | 8.1  | 7 988  | 8.1  | 7 501   | 7.5  |
| Health etc.                        |         |      |        |      | 1 378  | 1.4  | 570     | 0.6  | 552    | 0.6  | 837    | 0.8  | 955     | 0.9  |
| Personal services etc.             |         |      |        |      | 938    | 1    | 1 628   | 1.6  | 2 100  | 2.2  | 2 156  | 2.2  | 2 143   | 2.1  |
| Public administration etc.         |         |      |        |      | 670    | 0.7  | 846     | 0.8  | 834    | 0.9  | 941    | 1    | 1 004   | 1    |

**Table S5. Distribution of persons exposed to chlorinated organic solvents across demographic and labour market strata and over time.**

| Stratum                            | 1980   |      | 1985   |      | 1990   |      | 2001   |      | 2005  |      | 2009  |      | 2013  |      |
|------------------------------------|--------|------|--------|------|--------|------|--------|------|-------|------|-------|------|-------|------|
|                                    | n      | %    | n      | %    | n      | %    | n      | %    | n     | %    | n     | %    | n     | %    |
| <b>Exposed in study population</b> | 24 784 | 100  | 22 843 | 100  | 21 909 | 100  | 10 444 | 100  | 9 664 | 100  | 9 090 | 100  | 8 481 | 100  |
| <b>Age</b>                         |        |      |        |      |        |      |        |      |       |      |       |      |       |      |
| 18-24                              | 4 876  | 19.7 | 4 745  | 20.8 | 4 243  | 19.4 | 1 107  | 10.6 | 838   | 8.7  | 860   | 9.5  | 816   | 9.6  |
| 25-34                              | 6 957  | 28.1 | 6 019  | 26.3 | 5 822  | 26.6 | 2 887  | 27.6 | 2 346 | 24.3 | 1 952 | 21.5 | 1 833 | 21.6 |
| 35-44                              | 5 307  | 21.4 | 5 654  | 24.7 | 5 380  | 24.6 | 2 767  | 26.5 | 2 708 | 28   | 2 461 | 27.1 | 2 037 | 24   |
| 45-54                              | 4 048  | 16.3 | 3 733  | 16.3 | 4 159  | 19   | 2 209  | 21.1 | 2 115 | 21.9 | 2 144 | 23.6 | 2 170 | 25.6 |
| >=55                               | 3 597  | 14.5 | 2 695  | 11.8 | 2 307  | 10.5 | 1 475  | 14.1 | 1 662 | 17.2 | 1 675 | 18.4 | 1 625 | 19.2 |
| <b>Sex</b>                         |        |      |        |      |        |      |        |      |       |      |       |      |       |      |
| Females                            | 6 303  | 25.4 | 5 950  | 26   | 5 874  | 26.8 | 2 372  | 22.7 | 2 086 | 21.6 | 1 921 | 21.1 | 1 724 | 20.3 |
| Males                              | 18 482 | 74.6 | 16 894 | 74   | 16 035 | 73.2 | 8 073  | 77.3 | 7 577 | 78.4 | 7 167 | 78.9 | 6 756 | 79.7 |
| <b>Country of birth</b>            |        |      |        |      |        |      |        |      |       |      |       |      |       |      |
| Sweden                             | 20 843 | 84.1 | 19 622 | 85.9 | 18 706 | 85.4 | 8 890  | 85.1 | 8 267 | 85.5 | 7 672 | 84.4 | 7 099 | 83.7 |
| Other Nordic country               | 2 409  | 9.7  | 1 811  | 7.9  | 1 507  | 6.9  | 492    | 4.7  | 372   | 3.8  | 293   | 3.2  | 217   | 2.6  |
| Other European country             | 1 300  | 5.2  | 1 099  | 4.8  | 1 013  | 4.6  | 655    | 6.3  | 608   | 6.3  | 648   | 7.1  | 652   | 7.7  |
| Outside Europe                     | 229    | 0.9  | 311    | 1.4  | 680    | 3.1  | 408    | 3.9  | 420   | 4.3  | 474   | 5.2  | 511   | 6    |
| <b>Company size</b>                |        |      |        |      |        |      |        |      |       |      |       |      |       |      |
| 1-49 employees                     |        |      |        |      | 5 793  | 26.4 | 3 045  | 29.2 | 3 074 | 31.8 | 3 276 | 36.1 | 3 180 | 37.6 |
| 50+ employees                      |        |      |        |      | 16 117 | 73.6 | 7 388  | 70.8 | 6 578 | 68.2 | 5 804 | 63.9 | 5 274 | 62.4 |
| <b>Sector</b>                      |        |      |        |      |        |      |        |      |       |      |       |      |       |      |
| Private                            | 21 602 | 87.2 | 19 411 | 85.8 | 18 966 | 86.6 | 9 928  | 95.1 | 9 072 | 94   | 8 557 | 94.2 | 7 965 | 94.2 |
| Public                             | 3 161  | 12.8 | 3 221  | 14.2 | 2 935  | 13.4 | 508    | 4.9  | 577   | 6    | 523   | 5.8  | 489   | 5.8  |
| <b>Industry branch</b>             |        |      |        |      |        |      |        |      |       |      |       |      |       |      |
| Not specified                      |        |      |        |      | 277    | 1.3  | 46     | 0.4  | 50    | 0.5  | 45    | 0.5  | 48    | 0.6  |
| Agriculture etc.                   |        |      |        |      | 117    | 0.5  | 32     | 0.3  | 57    | 0.6  | 57    | 0.6  | 48    | 0.6  |
| Manufacturing etc.                 |        |      |        |      | 12 686 | 57.9 | 7 117  | 68.1 | 5 992 | 62   | 5 277 | 58   | 4 538 | 53.5 |
| Energy supply                      |        |      |        |      | 95     | 0.4  | 90     | 0.9  | 101   | 1    | 95    | 1    | 91    | 1.1  |
| Construction                       |        |      |        |      | 2 076  | 9.5  | 812    | 7.8  | 785   | 8.1  | 888   | 9.8  | 940   | 11.1 |
| Trade etc.                         |        |      |        |      | 2 413  | 11   | 1 021  | 9.8  | 1 154 | 11.9 | 1 180 | 13   | 1 199 | 14.1 |
| Financial activities etc.          |        |      |        |      | 682    | 3.1  | 527    | 5    | 669   | 6.9  | 728   | 8    | 895   | 10.6 |
| Education etc.                     |        |      |        |      | 737    | 3.4  | 149    | 1.4  | 196   | 2    | 168   | 1.8  | 86    | 1    |
| Health etc.                        |        |      |        |      | 1 455  | 6.6  | 235    | 2.3  | 236   | 2.4  | 254   | 2.8  | 246   | 2.9  |
| Personal services etc.             |        |      |        |      | 1 119  | 5.1  | 299    | 2.9  | 315   | 3.3  | 323   | 3.6  | 314   | 3.7  |
| Public administration etc.         |        |      |        |      | 252    | 1.2  | 116    | 1.1  | 106   | 1.1  | 79    | 0.9  | 72    | 0.8  |

**Table S6. Distribution of persons exposed to lead across demographic and labour market strata and over time.**

| Stratum                            | 1980    |      | 1985   |      | 1990   |      | 2001   |      | 2005   |      | 2009   |      | 2013   |      |
|------------------------------------|---------|------|--------|------|--------|------|--------|------|--------|------|--------|------|--------|------|
|                                    | n       | %    | n      | %    | n      | %    | n      | %    | n      | %    | n      | %    | n      | %    |
| <b>Exposed in study population</b> | 108 215 | 100  | 82 487 | 100  | 52 594 | 100  | 13 098 | 100  | 10 869 | 100  | 10 451 | 100  | 10 303 | 100  |
| <b>Age</b>                         |         |      |        |      |        |      |        |      |        |      |        |      |        |      |
| 18-24                              | 20 238  | 18.7 | 16 266 | 19.7 | 9 641  | 18.3 | 1 024  | 7.8  | 708    | 6.5  | 766    | 7.3  | 708    | 6.9  |
| 25-34                              | 31 957  | 29.5 | 21 583 | 26.2 | 13 486 | 25.6 | 3 064  | 23.4 | 2 333  | 21.5 | 2 404  | 23   | 2 464  | 23.9 |
| 35-44                              | 25 850  | 23.9 | 22 103 | 26.8 | 13 094 | 24.9 | 3 462  | 26.4 | 2 989  | 27.5 | 2 740  | 26.2 | 2 524  | 24.5 |
| 45-54                              | 17 179  | 15.9 | 13 760 | 16.7 | 10 997 | 20.9 | 3 218  | 24.6 | 2 597  | 23.9 | 2 403  | 23   | 2 488  | 24.2 |
| >=55                               | 12 997  | 12   | 8 773  | 10.6 | 5 374  | 10.2 | 2 330  | 17.8 | 2 242  | 20.6 | 2 140  | 20.5 | 2 118  | 20.6 |
| <b>Sex</b>                         |         |      |        |      |        |      |        |      |        |      |        |      |        |      |
| Females                            | 16 299  | 15.1 | 14 274 | 17.3 | 9 070  | 17.2 | 1 678  | 12.8 | 1 639  | 15.1 | 1 706  | 16.3 | 1 849  | 17.9 |
| Males                              | 91 918  | 84.9 | 68 216 | 82.7 | 43 522 | 82.8 | 11 417 | 87.2 | 9 228  | 84.9 | 8 744  | 83.7 | 8 452  | 82.1 |
| <b>Country of birth</b>            |         |      |        |      |        |      |        |      |        |      |        |      |        |      |
| Sweden                             | 94 435  | 87.3 | 72 732 | 88.2 | 46 005 | 87.5 | 11 867 | 90.6 | 9 822  | 90.3 | 9 423  | 90.2 | 9 271  | 90   |
| Other Nordic country               | 8 829   | 8.2  | 5 885  | 7.1  | 3 554  | 6.8  | 538    | 4.1  | 386    | 3.6  | 295    | 2.8  | 233    | 2.3  |
| Other European country             | 4 204   | 3.9  | 3 015  | 3.7  | 1 865  | 3.5  | 434    | 3.3  | 397    | 3.7  | 420    | 4    | 442    | 4.3  |
| Outside Europe                     | 743     | 0.7  | 854    | 1    | 1 169  | 2.2  | 258    | 2    | 268    | 2.5  | 314    | 3    | 359    | 3.5  |
| <b>Company size</b>                |         |      |        |      |        |      |        |      |        |      |        |      |        |      |
| 1-49 employees                     |         |      |        |      | 12 891 | 24.5 | 3 372  | 25.8 | 2 623  | 24.2 | 2 736  | 26.2 | 2 683  | 26.1 |
| 50+ employees                      |         |      |        |      | 39 702 | 75.5 | 9 715  | 74.2 | 8 235  | 75.8 | 7 711  | 73.8 | 7 598  | 73.9 |
| <b>Sector</b>                      |         |      |        |      |        |      |        |      |        |      |        |      |        |      |
| Private                            | 84 755  | 78.4 | 63 629 | 77.7 | 41 454 | 78.8 | 9 258  | 70.7 | 7 363  | 67.8 | 6 815  | 65.3 | 6 567  | 63.9 |
| Public                             | 23 346  | 21.6 | 18 210 | 22.3 | 11 130 | 21.2 | 3 831  | 29.3 | 3 496  | 32.2 | 3 629  | 34.7 | 3 711  | 36.1 |
| <b>Industry branch</b>             |         |      |        |      |        |      |        |      |        |      |        |      |        |      |
| Not specified                      |         |      |        |      | 448    | 0.9  | 73     | 0.6  | 55     | 0.5  | 46     | 0.4  | 68     | 0.7  |
| Agriculture etc.                   |         |      |        |      | 148    | 0.3  | 33     | 0.3  | 35     | 0.3  | 28     | 0.3  | 21     | 0.2  |
| Manufacturing etc.                 |         |      |        |      | 28 080 | 53.4 | 5 233  | 40   | 4 491  | 41.3 | 3 757  | 36   | 3 403  | 33   |
| Energy supply                      |         |      |        |      | 442    | 0.8  | 91     | 0.7  | 82     | 0.8  | 77     | 0.7  | 78     | 0.8  |
| Construction                       |         |      |        |      | 6 974  | 13.3 | 2 275  | 17.4 | 1 350  | 12.4 | 1 494  | 14.3 | 1 548  | 15   |
| Trade etc.                         |         |      |        |      | 12 396 | 23.6 | 509    | 3.9  | 524    | 4.8  | 515    | 4.9  | 479    | 4.7  |
| Financial activities etc.          |         |      |        |      | 1 351  | 2.6  | 940    | 7.2  | 704    | 6.5  | 726    | 6.9  | 815    | 7.9  |
| Education etc.                     |         |      |        |      | 127    | 0.2  | 230    | 1.8  | 137    | 1.3  | 121    | 1.2  | 104    | 1    |
| Health etc.                        |         |      |        |      | 325    | 0.6  | 94     | 0.7  | 57     | 0.5  | 98     | 0.9  | 97     | 0.9  |
| Personal services etc.             |         |      |        |      | 233    | 0.4  | 378    | 2.9  | 274    | 2.5  | 260    | 2.5  | 247    | 2.4  |
| Public administration etc.         |         |      |        |      | 2 083  | 4    | 3 238  | 24.7 | 3 157  | 29.1 | 3 325  | 31.8 | 3 440  | 33.4 |

**Table S7. Change in percent points per 10 years in each stratum and the absolute difference of change in exposed vs. population over the period 2001-2013. Light blue: small difference; dark blue: large difference.**

| Variable                               | Population      | RCS             |             | Diesel exhaust  |             | Wood dust       |             | Welding fumes   |             | Chlor. solvents |             | Lead            |             |
|----------------------------------------|-----------------|-----------------|-------------|-----------------|-------------|-----------------|-------------|-----------------|-------------|-----------------|-------------|-----------------|-------------|
|                                        | Change per 10 y | Change per 10 y | diff vs pop | Change per 10 y | diff vs pop | Change per 10 y | diff vs pop | Change per 10 y | diff vs pop | Change per 10 y | diff vs pop | Change per 10 y | diff vs pop |
| Ages 18-24                             | 0.66            | 3.21            | 2.55        | 0.73            | 0.07        | 2.6             | 1.94        | 2.07            | 1.41        | -0.11           | 0.77        | -0.08           | 0.74        |
| Ages 25-34                             | -1.93           | -1.59           | 0.34        | 0.24            | 2.17        | -1.73           | 0.2         | -2.59           | 0.66        | -5.4            | 3.47        | 2.02            | 3.95        |
| Ages 35-44                             | -0.65           | -4.04           | 3.39        | -5.18           | 4.53        | -3.11           | 2.46        | -4.04           | 3.39        | -2.28           | 1.63        | -2.2            | 1.55        |
| Ages 45-54                             | 0.59            | 2.02            | 1.43        | 1.35            | 0.76        | 1.64            | 1.05        | 2.11            | 1.52        | 4.01            | 3.42        | -1.02           | 1.61        |
| Ages >=55                              | 1.32            | 0.41            | 0.91        | 2.86            | 1.54        | 0.6             | 0.72        | 2.47            | 1.15        | 3.78            | 2.46        | 1.27            | 0.05        |
| Females                                | -0.47           | -0.66           | 0.19        | 1.28            | 1.75        | -1.67           | 1.2         | 0.25            | 0.72        | -1.94           | 1.47        | 4.44            | 4.91        |
| Males                                  | 0.47            | 0.66            | 0.19        | -1.28           | 1.75        | 1.67            | 1.2         | -0.25           | 0.72        | 1.94            | 1.47        | -4.44           | 4.91        |
| Country of birth: Sweden               | -3.36           | -2.69           | 0.67        | -5.64           | 2.28        | -3.48           | 0.12        | -1.19           | 2.17        | -1.27           | 2.09        | -0.48           | 2.88        |
| Country of birth: Other Nordic country | -0.97           | -1.74           | 0.77        | -0.88           | 0.09        | -0.93           | 0.04        | -1.75           | 0.78        | -1.74           | 0.77        | -1.61           | 0.64        |
| Country of birth: Other European c.    | 1.53            | 2.85            | 1.32        | 2.16            | 0.63        | 2.8             | 1.27        | 1.34            | 0.19        | 1.26            | 0.27        | 0.81            | 0.72        |
| Country of birth: Outside Europe       | 2.79            | 1.58            | 1.21        | 4.35            | 1.56        | 1.61            | 1.18        | 1.6             | 1.19        | 1.75            | 1.04        | 1.27            | 1.52        |
| 1-49 employees                         | 3.07            | 9.01            | 5.94        | 0.76            | 2.31        | 10.22           | 7.15        | 4.65            | 1.58        | 7.95            | 4.88        | 0.27            | 2.8         |
| 50+ employees                          | -3.07           | -9.01           | 5.94        | -0.76           | 2.31        | -10.22          | 7.15        | -4.65           | 1.58        | -7.95           | 4.88        | -0.27           | 2.8         |
| Private sector                         | 3.68            | 1.19            | 2.49        | 1.19            | 2.49        | 1.89            | 1.79        | 1.49            | 2.19        | -0.46           | 4.14        | -6.43           | 10.11       |
| Public sector                          | -3.68           | -1.19           | 2.49        | -1.19           | 2.49        | -1.89           | 1.79        | -1.49           | 2.19        | 0.46            | 4.14        | 6.43            | 10.11       |
| Industry branch not specified          | -0.28           | 1.08            | 1.36        | -0.1            | 0.18        | 0.98            | 1.26        | 0.17            | 0.45        | 0.15            | 0.43        | 0.05            | 0.33        |
| Agriculture etc.                       | -0.09           | -0.15           | 0.06        | -0.18           | 0.09        | -0.15           | 0.06        | -0.04           | 0.05        | 0.23            | 0.32        | -0.05           | 0.04        |
| Manufacturing etc.                     | -5.26           | -12.49          | 7.23        | -2.99           | 2.27        | -14.95          | 9.69        | -8.63           | 3.37        | -11.74          | 6.48        | -6.21           | 0.95        |
| Energy supply                          | 0.13            | 0.15            | 0.02        | 0.13            | 0           | 0.07            | 0.06        | 0.13            | 0           | 0.04            | 0.09        | -0.02           | 0.15        |
| Construction                           | 1.1             | 8.23            | 7.13        | 2.16            | 1.06        | 9.97            | 8.87        | 4.71            | 3.61        | 3.15            | 2.05        | -1.37           | 2.47        |
| Trade etc.                             | 2.45            | 0.12            | 2.33        | -0.21           | 2.66        | 0.39            | 2.06        | 1.8             | 0.65        | 3.54            | 1.09        | 0.54            | 1.91        |
| Financial activities etc.              | 2.21            | 2.51            | 0.3         | 1.54            | 0.67        | 2.91            | 0.7         | 2.21            | 0           | 4.4             | 2.19        | 0.18            | 2.03        |
| Education etc.                         | 0.2             | 0.2             | 0           | -0.15           | 0.35        | 0.2             | 0           | -0.44           | 0.64        | -0.49           | 0.69        | -0.73           | 0.93        |
| Health etc.                            | -1.16           | 0.19            | 1.35        | 0.25            | 1.41        | 0.34            | 1.5         | 0.75            | 1.91        | 0.55            | 1.71        | 0.3             | 1.46        |
| Personal services etc.                 | 0.65            | 0.07            | 0.58        | 0.13            | 0.52        | 0.18            | 0.47        | -0.19           | 0.84        | 0.54            | 0.11        | -0.81           | 1.46        |
| Public administration etc.             | 0.04            | 0.09            | 0.05        | -0.58           | 0.62        | 0.05            | 0.01        | -0.48           | 0.52        | -0.36           | 0.4         | 8.11            | 8.07        |



**Table S8. Change in percent points per 10 years over the period 2001-2013. Point estimates from linear regression and 95% confidence intervals obtained by boot-strapping. Statistically significant differences between each exposure and the population are marked in bold.**

| Variable                   | Population | RCS                            | Diesel exhaust               | Welding                      | Wood dust                       | Chlorinated solvents            | Lead                         |
|----------------------------|------------|--------------------------------|------------------------------|------------------------------|---------------------------------|---------------------------------|------------------------------|
| <b>Age</b>                 |            |                                |                              |                              |                                 |                                 |                              |
| 18-24                      | 0,66       | <b>3.21 (1.87 - 4.56)</b>      | 0.73 (0.11 - 1.36)           | <b>2.07 (0.86 - 3.27)</b>    | <b>2.6 (1.41 - 3.78)</b>        | -0.11 (-1.22 - 0.99)            | -0.08 (-0.94 - 0.78)         |
| 25-34                      | -1,93      | -1.59 (-3.3 - 0.12)            | <b>0.24 (-0.53 - 1.02)</b>   | -2.59 (-4.29 - -0.9)         | -1.73 (-3.13 - -0.32)           | <b>-5.4 (-6.64 - -4.16)</b>     | <b>2.02 (0.66 - 3.39)</b>    |
| 35-44                      | -0,65      | <b>-4.04 (-5.47 - -2.62)</b>   | <b>-5.18 (-5.81 - -4.56)</b> | <b>-4.04 (-5.45 - -2.64)</b> | <b>-3.11 (-4.06 - -2.15)</b>    | <b>-2.28 (-3.79 - -0.77)</b>    | <b>-2.2 (-3.11 - -1.29)</b>  |
| 45-54                      | 0,59       | <b>2.02 (0.83 - 3.2)</b>       | <b>1.35 (0.75 - 1.95)</b>    | <b>2.11 (1.43 - 2.78)</b>    | 1.64 (0.52 - 2.76)              | <b>4.01 (3.11 - 4.91)</b>       | <b>-1.02 (-2 - -0.03)</b>    |
| >=55                       | 1,32       | 0.41 (-0.83 - 1.64)            | <b>2.86 (1.73 - 3.98)</b>    | 2.47 (1.2 - 3.74)            | 0.6 (-0.95 - 2.14)              | <b>3.78 (3.02 - 4.55)</b>       | 1.27 (0.19 - 2.35)           |
| <b>Sex</b>                 |            |                                |                              |                              |                                 |                                 |                              |
| Females                    | -0,47      | -0.66 (-1.2 - -0.12)           | <b>1.28 (0.93 - 1.64)</b>    | <b>0.25 (0.08 - 0.42)</b>    | <b>-1.67 (-2 - -1.34)</b>       | <b>-1.94 (-2.22 - -1.66)</b>    | <b>4.44 (4.04 - 4.83)</b>    |
| Males                      | 0,47       | 0.66 (0.12 - 1.2)              | <b>-1.28 (-1.64 - -0.93)</b> | <b>-0.25 (-0.42 - -0.08)</b> | <b>1.67 (1.34 - 2)</b>          | <b>1.94 (1.66 - 2.22)</b>       | <b>-4.44 (-4.83 - -4.04)</b> |
| <b>Country of birth</b>    |            |                                |                              |                              |                                 |                                 |                              |
| Sweden                     | -3,36      | -2.69 (-3.41 - -1.97)          | <b>-5.64 (-6.27 - -5)</b>    | <b>-1.19 (-1.52 - -0.86)</b> | -3.48 (-4.21 - -2.75)           | <b>-1.27 (-1.77 - -0.78)</b>    | <b>-0.48 (-0.73 - -0.23)</b> |
| Other Nordic countries     | -0,97      | <b>-1.74 (-1.8 - -1.68)</b>    | <b>-0.88 (-0.91 - -0.85)</b> | <b>-1.75 (-1.82 - -1.68)</b> | -0.93 (-0.97 - -0.9)            | <b>-1.74 (-1.85 - -1.63)</b>    | <b>-1.61 (-1.67 - -1.54)</b> |
| Other Europe               | 1,53       | <b>2.85 (2.35 - 3.34)</b>      | <b>2.16 (1.93 - 2.4)</b>     | 1.34 (1.12 - 1.57)           | <b>2.8 (2.31 - 3.29)</b>        | <b>1.26 (1.01 - 1.51)</b>       | <b>0.81 (0.68 - 0.95)</b>    |
| Outside Europe             | 2,79       | <b>1.58 (1.32 - 1.85)</b>      | <b>4.35 (3.93 - 4.78)</b>    | <b>1.6 (1.42 - 1.77)</b>     | <b>1.61 (1.38 - 1.85)</b>       | <b>1.75 (1.56 - 1.94)</b>       | <b>1.27 (1.14 - 1.4)</b>     |
| <b>Company size</b>        |            |                                |                              |                              |                                 |                                 |                              |
| 1-49 employees             | 3,07       | <b>9.01 (7.4 - 10.62)</b>      | <b>0.76 (-0.04 - 1.55)</b>   | <b>4.65 (3.84 - 5.47)</b>    | <b>10.22 (8.93 - 11.51)</b>     | <b>7.95 (6.86 - 9.05)</b>       | <b>0.27 (-0.88 - 1.43)</b>   |
| 50+ employees              | -3,07      | <b>-9.01 (-10.62 - -7.4)</b>   | <b>-0.76 (-1.55 - 0.04)</b>  | <b>-4.65 (-5.47 - -3.84)</b> | <b>-10.22 (-11.51 - -8.93)</b>  | <b>-7.95 (-9.05 - -6.86)</b>    | <b>-0.27 (-1.43 - 0.88)</b>  |
| <b>Sector</b>              |            |                                |                              |                              |                                 |                                 |                              |
| Private                    | 3,68       | <b>1.19 (0.78 - 1.59)</b>      | <b>1.19 (0.94 - 1.44)</b>    | <b>1.49 (1.12 - 1.86)</b>    | <b>1.89 (1.15 - 2.64)</b>       | <b>-0.46 (-0.96 - 0.05)</b>     | <b>-6.43 (-7.62 - -5.23)</b> |
| Public                     | -3,68      | <b>-1.19 (-1.59 - -0.78)</b>   | <b>-1.19 (-1.44 - -0.94)</b> | <b>-1.49 (-1.86 - -1.12)</b> | <b>-1.89 (-2.64 - -1.15)</b>    | <b>0.46 (-0.05 - 0.96)</b>      | <b>6.43 (5.23 - 7.62)</b>    |
| <b>Industry branch</b>     |            |                                |                              |                              |                                 |                                 |                              |
| Not specified              | -0,28      | <b>1.08 (0.59 - 1.56)</b>      | <b>-0.1 (-0.21 - 0.02)</b>   | <b>0.17 (0 - 0.33)</b>       | <b>0.98 (0.57 - 1.4)</b>        | <b>0.15 (-0.04 - 0.33)</b>      | <b>0.05 (-0.14 - 0.23)</b>   |
| Agriculture etc.           | -0,09      | -0.15 (-0.34 - 0.03)           | -0.18 (-0.38 - 0.01)         | -0.04 (-0.13 - 0.06)         | -0.15 (-0.36 - 0.05)            | <b>0.23 (0.11 - 0.35)</b>       | -0.05 (-0.11 - 0.01)         |
| Manufacturing etc.         | -5,26      | <b>-12.49 (-14.07 - -10.9)</b> | <b>-2.99 (-4.41 - -1.58)</b> | <b>-8.63 (-9.53 - -7.72)</b> | <b>-14.95 (-16.58 - -13.31)</b> | <b>-11.74 (-12.73 - -10.74)</b> | -6.21 (-8.83 - -3.6)         |
| Energy supply              | 0,13       | 0.15 (0.06 - 0.25)             | 0.13 (-0.03 - 0.3)           | 0.13 (0.04 - 0.22)           | 0.07 (-0.01 - 0.16)             | 0.04 (-0.1 - 0.17)              | <b>-0.02 (-0.11 - 0.07)</b>  |
| Construction               | 1,1        | <b>8.23 (7.15 - 9.31)</b>      | <b>2.16 (1.74 - 2.59)</b>    | <b>4.71 (4.12 - 5.3)</b>     | <b>9.97 (8.76 - 11.17)</b>      | <b>3.15 (2.62 - 3.69)</b>       | <b>-1.37 (-3.79 - 1.06)</b>  |
| Trade etc.                 | 2,45       | <b>0.12 (-0.21 - 0.45)</b>     | <b>-0.21 (-2.4 - 1.98)</b>   | <b>1.8 (1.45 - 2.16)</b>     | <b>0.39 (0.04 - 0.74)</b>       | <b>3.54 (3.13 - 3.95)</b>       | <b>0.54 (0.1 - 0.99)</b>     |
| Financial activities etc.  | 2,21       | 2.51 (1.44 - 3.57)             | <b>1.54 (1 - 2.08)</b>       | 2.21 (1.65 - 2.76)           | 2.91 (2.01 - 3.81)              | <b>4.4 (3.87 - 4.94)</b>        | <b>0.18 (-0.47 - 0.84)</b>   |
| Education etc.             | 0,2        | 0.2 (0.11 - 0.29)              | <b>-0.15 (-0.25 - -0.05)</b> | <b>-0.44 (-0.55 - -0.32)</b> | 0.2 (-0.38 - 0.77)              | <b>-0.49 (-1.09 - 0.11)</b>     | <b>-0.73 (-0.91 - -0.54)</b> |
| Health etc.                | -1,16      | <b>0.19 (0.1 - 0.28)</b>       | <b>0.25 (0.16 - 0.33)</b>    | <b>0.75 (0.48 - 1.03)</b>    | <b>0.34 (0.21 - 0.48)</b>       | <b>0.55 (0.42 - 0.68)</b>       | <b>0.3 (0.1 - 0.5)</b>       |
| Personal services etc.     | 0,65       | <b>0.07 (-0.18 - 0.32)</b>     | <b>0.13 (0.03 - 0.23)</b>    | <b>-0.19 (-0.62 - 0.24)</b>  | <b>0.18 (-0.11 - 0.48)</b>      | 0.54 (0.37 - 0.7)               | <b>-0.81 (-1.23 - -0.39)</b> |
| Public administration etc. | 0,04       | 0.09 (0 - 0.18)                | <b>-0.58 (-0.78 - -0.37)</b> | <b>-0.48 (-0.68 - -0.28)</b> | 0.05 (-0.04 - 0.14)             | <b>-0.36 (-0.49 - -0.24)</b>    | <b>8.11 (6.69 - 9.54)</b>    |

## Respirable crystalline silica

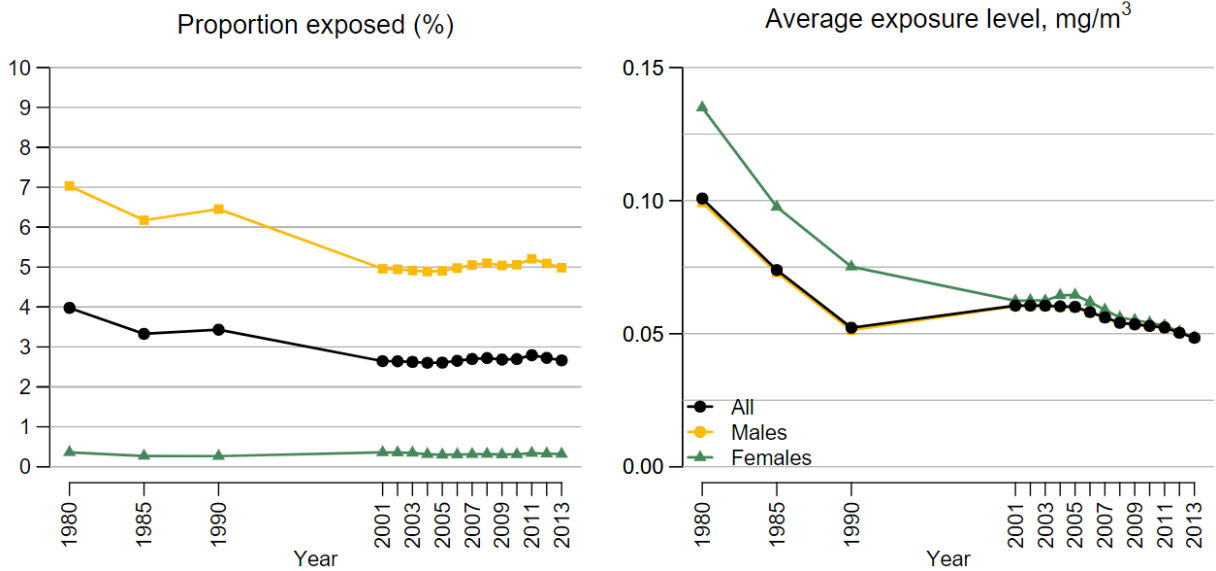

## Diesel engine exhaust

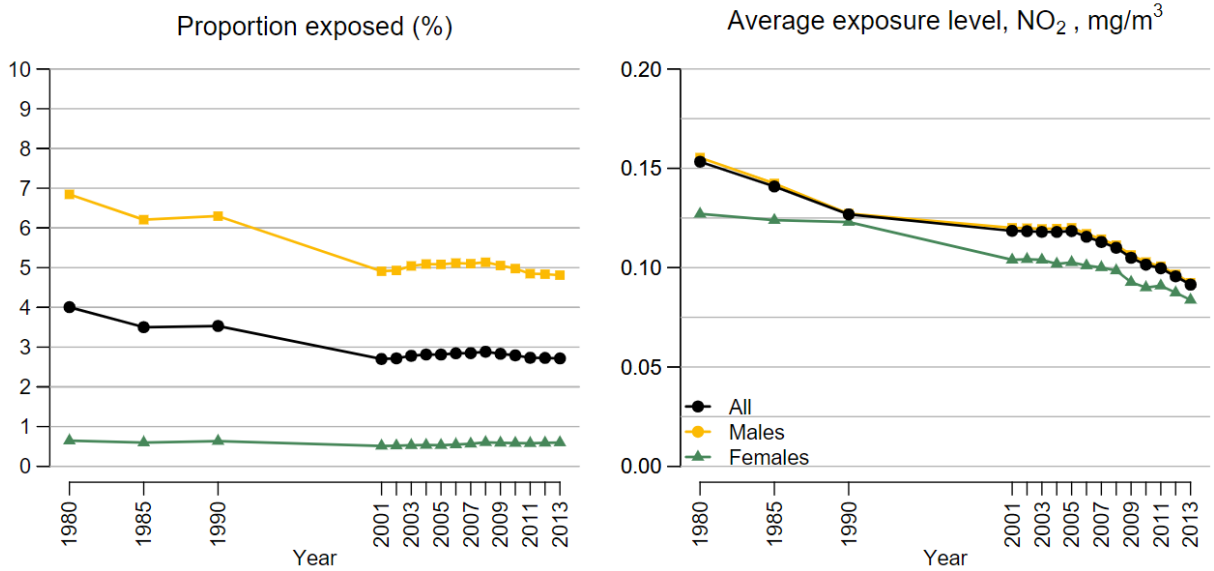

## Welding fumes

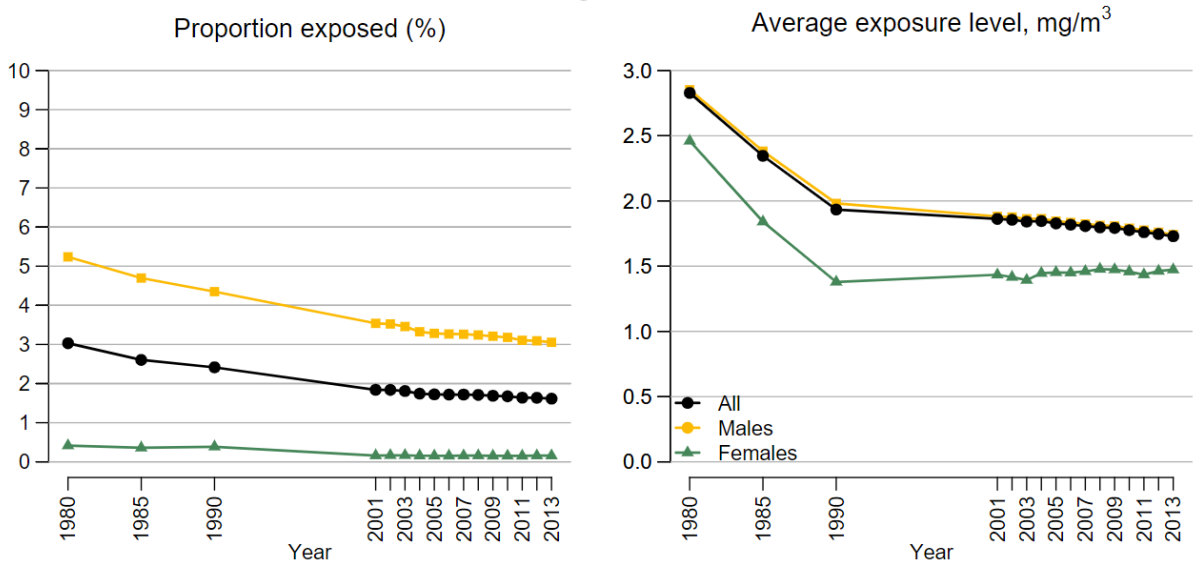

Fig S1. Time trends in proportions of the population being exposed to respirable crystalline silica, diesel engine exhaust and welding fumes, and the average exposure level in the exposed.

## Wood dust

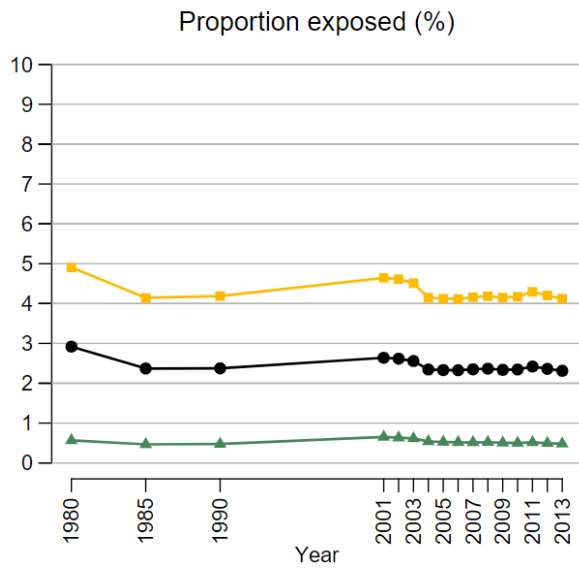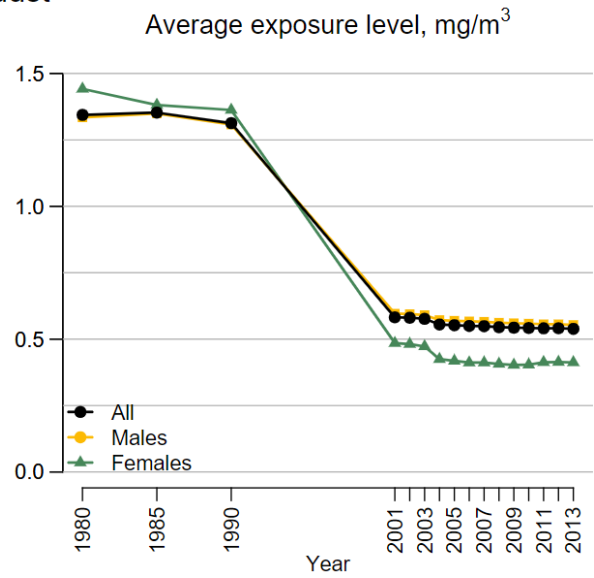

## Chlorinated hydrocarbon solvents

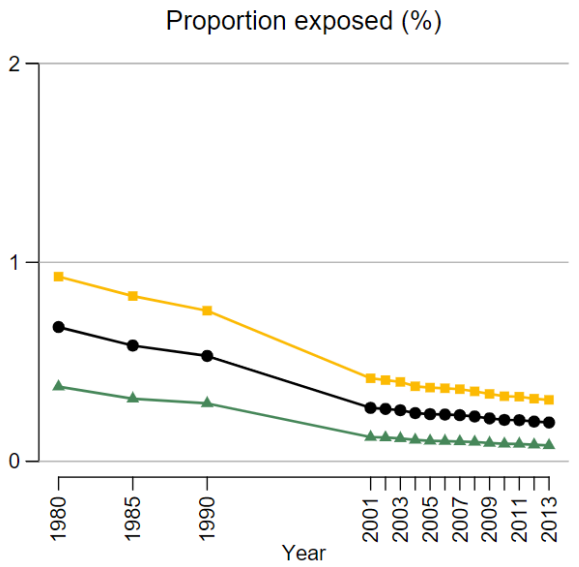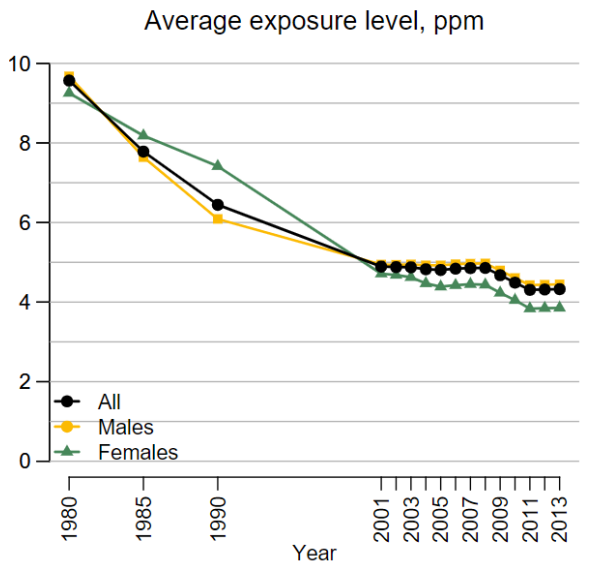

## Lead

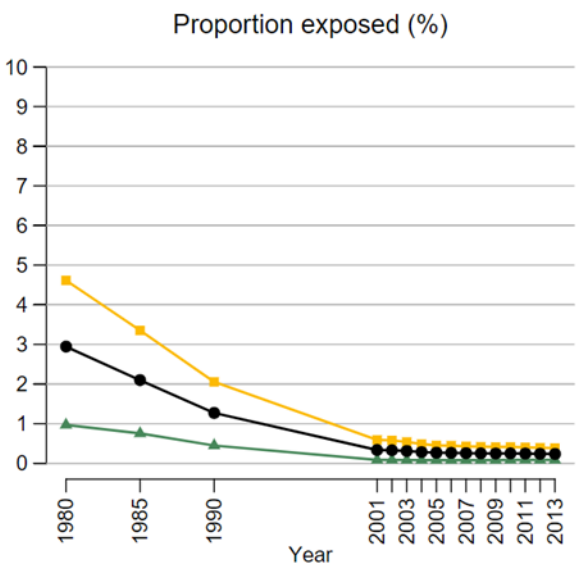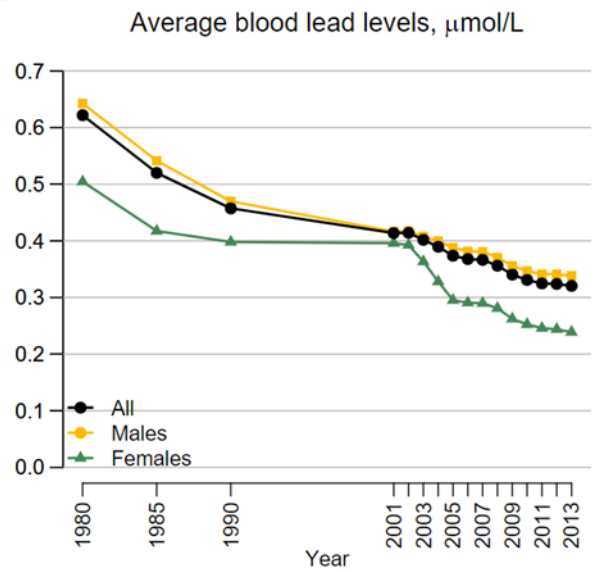

Fig S2. Time trends in proportion of the population being exposed to wood dust, chlorinated hydrocarbon solvents, and lead, and the average exposure level in the exposed.
